# Supplementary material for: Genome-wide Association Study of a Panel of Vietnamese Rice Landraces Reveals New QTLs for Tolerance to Water Deficit During the Vegetative Phase
Source: PubMed Central journal article supplement (PMC6357217; doi:10.1186/s12284-018-0258-6), 2019-01-28

Indica

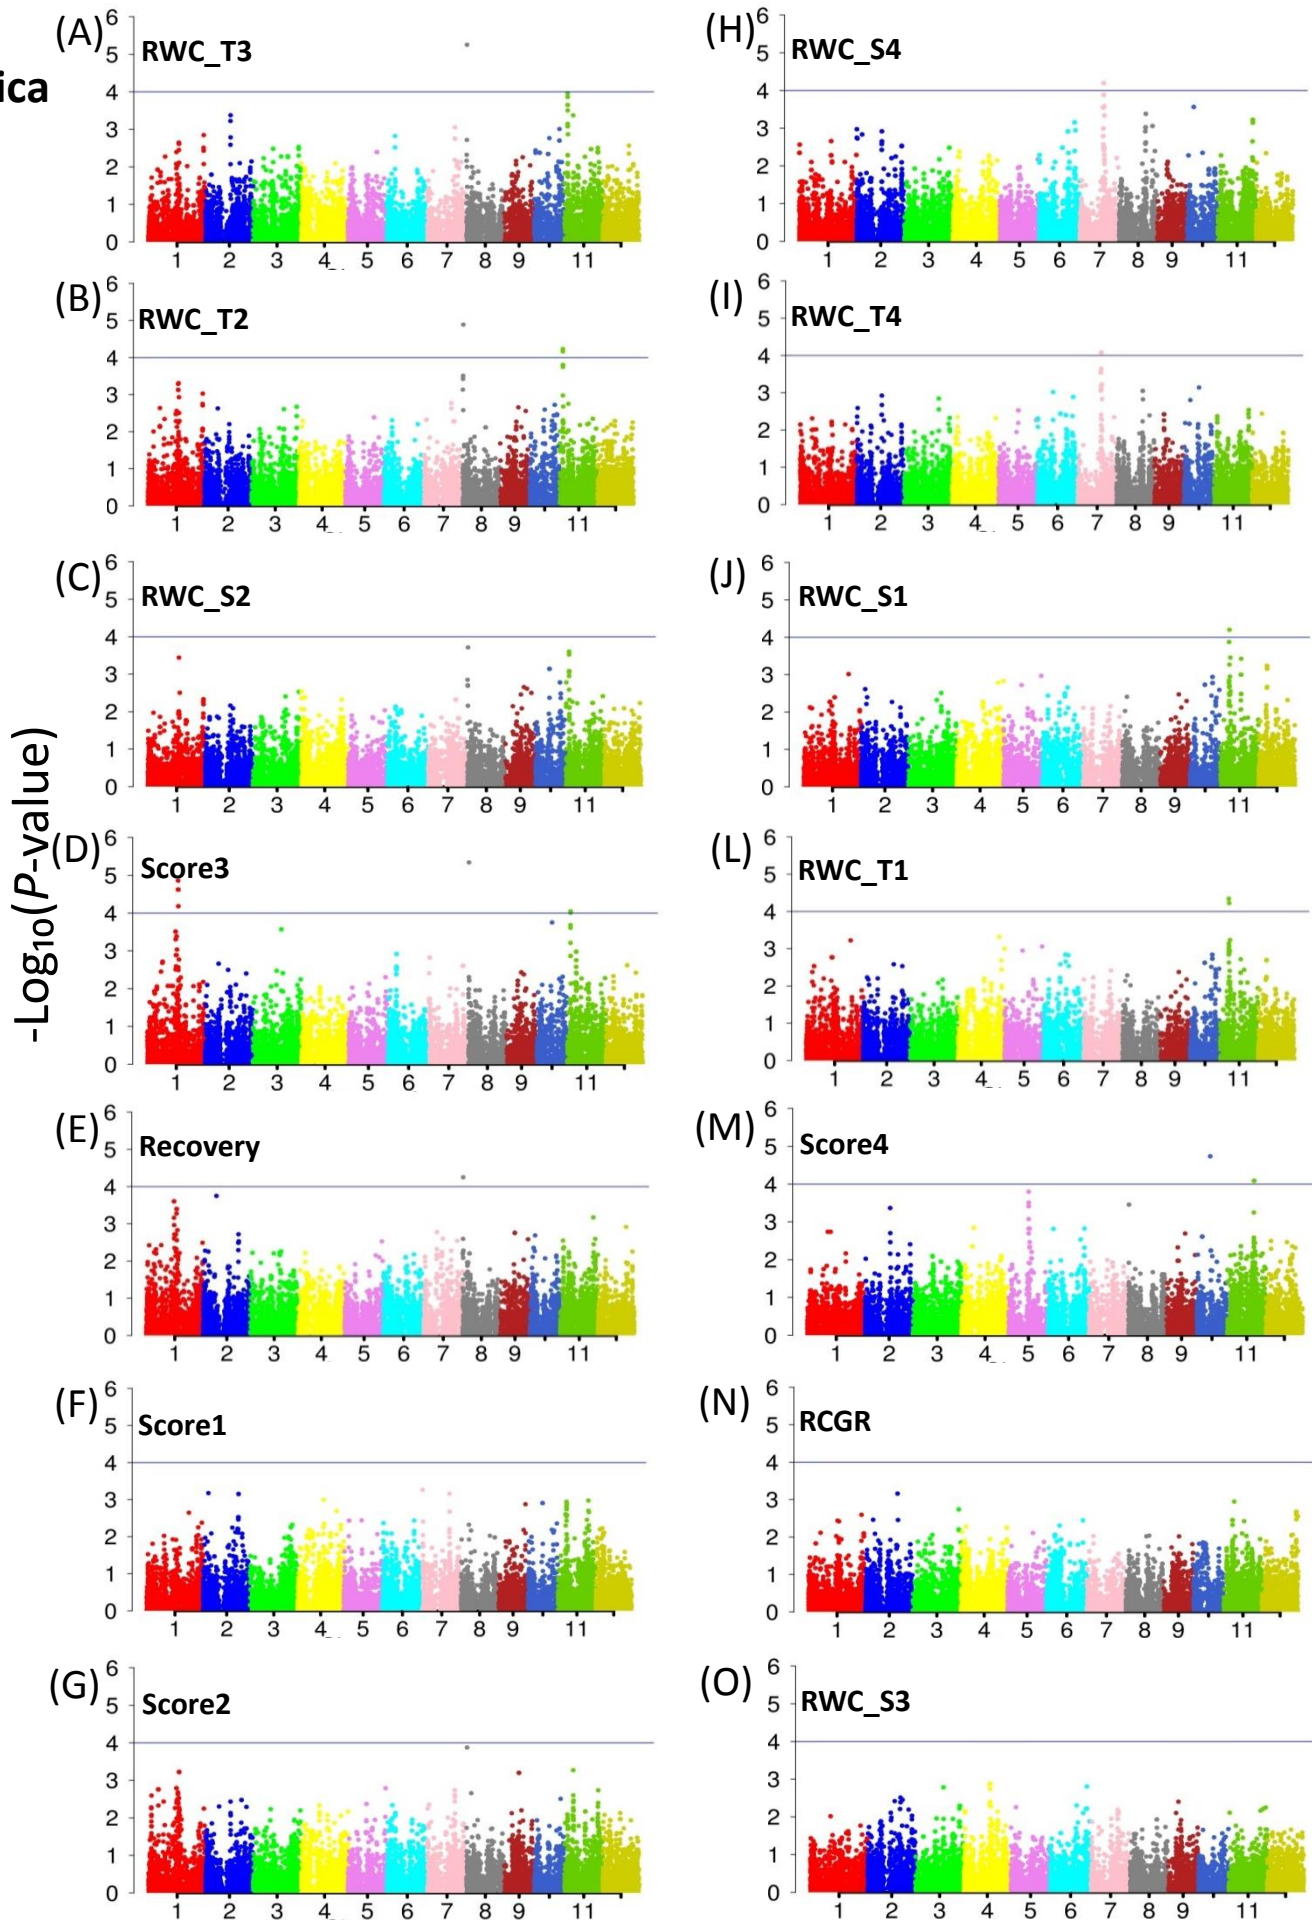

Supplement: 12284_2018_258_MOESM4_ESM.pdf [file 12284_2018_258_MOESM4_ESM.pdf]
